# Supplementary material for: A High-Resolution Genetic Map of Yellow Monkeyflower Identifies Chemical Defense QTLs and Recombination Rate Variation
Source: PubMed Central journal article supplement (PMC4025480; doi:10.1534/g3.113.010124), 2014-03-13
Supplement: supp_g3.113.010124_TableS2.pdf [file supp_g3.113.010124_TableS2.pdf]

**Table S2 Results of GLM ANOVA.** Factors with a significant effect on levels of a particular PPG are in bold type.

| PPG          | Factor               | F     | df numerator,<br>df denominator | p-value |
|--------------|----------------------|-------|---------------------------------|---------|
| Conandroside | <b>RIL (Grow-up)</b> | 6.69  | 207, 571                        | <0.001  |
|              | Damage?              | 3.51  | 1, 571                          | 0.061   |
|              | <b>Grow-up</b>       | 10.23 | 2, 571                          | <0.001  |
|              | <b>Quant. method</b> | 8.25  | 1, 571                          | 0.004   |
| PPG 5        | <b>RIL (Grow-up)</b> | 2.45  | 207, 571                        | <0.001  |
|              | Damage?              | 0.10  | 1, 571                          | 0.756   |
|              | <b>Grow-up</b>       | 3.17  | 2, 571                          | 0.044   |
|              | Quant. method        | 0.22  | 1, 571                          | 0.641   |
| PPG 7        | <b>RIL (Grow-up)</b> | 5.32  | 149, 193                        | <0.001  |
|              | Damage?              | 0.01  | 1, 193                          | 0.944   |
|              | <b>Grow-up</b>       | 8.02  | 2, 193                          | <0.001  |
|              | Quant. method        | ---   | ---                             | ---     |
